# Supplementary material for: A Heuristic Approach to Identify the Steel Grid Direction of R/C Slabs Using the Yield‐Line Method for Analysis
Source: Hindawi journal article supplement (doi:10.1155/2019/6017146), 2019-01-01
Supplement: f1 [file 6017146.f1.doc]

**HIGHLIGHTS**

1. An heuristic approach to identify the steel grid direction of R/C slabs is proposed.
2. Structural analysis of R/C slabs is performed by using the yield-line method.
3. A zero-th order optimization algorithm is used in association to the yeld-line method.
4. The ultimate load, the parameters defining the collapse mechanism, and the worst and the best reinforcement orientation are identified.
5. An example of application of the proposed heuristic approach is developed.
